# Supplementary material
Source: publisher figshare collection journal article supplement (https://rs.figshare.com/ndownloader/files/21820569)
Supplement: Supplementary file [file 21820569]

Supplementary material

# Encoding fear intensity in human sweat

Jasper H. B. de Groot<sup>1,2</sup>, Peter A. Kirk<sup>1</sup>, Jay A. Gottfried<sup>1,3</sup>

<sup>1</sup>Department of Neurology, University of Pennsylvania, 3400 Spruce Street, Philadelphia, PA 19104, USA; <sup>2</sup>Department of Psychology, Utrecht University, Heidelberglaan 1, Utrecht, 3584 CS, the Netherlands; <sup>3</sup>Department of Psychology, University of Pennsylvania, 3720 Walnut Street, Philadelphia, PA 19104, USA

## Pilot test: Selecting scary videos to induce fear

Inclusion criteria and test settings (dark room, temperature: 24°C) matched those of the final study. Fifteen males (age:  $M = 20.33$  years, range = 18–22) watched thirteen randomly presented horror clips (65 min) and after each clip, they rated their feelings in return for course credit. Their scores on ten items (0 = “absent”; 5 = “extreme”) were averaged into a single discrete *fear spectrum score*, with target states “fearful”, “nervous”, “tense” keeping their original ratings, and “disgusted”, “happy”, “angry”, “sad”, “calm”, and “relaxed” being reverse scored. The six clips (~30 min) receiving the highest fear spectrum scores were used in the final study. On average, the chosen film clips (Figure S1) had fear spectrum scores that were significantly ( $M = 1.91$  points) higher than 0,  $t(14) = 6.19$ ,  $p < .001$ . This highlights the effective induction of a discrete fear-like experience, which varied in strength across subjects ( $SD = 1.20$ ). Marked variability in fear experiences actually aids the final study’s division of subjects into different fear intensity groups (low, medium, and high).

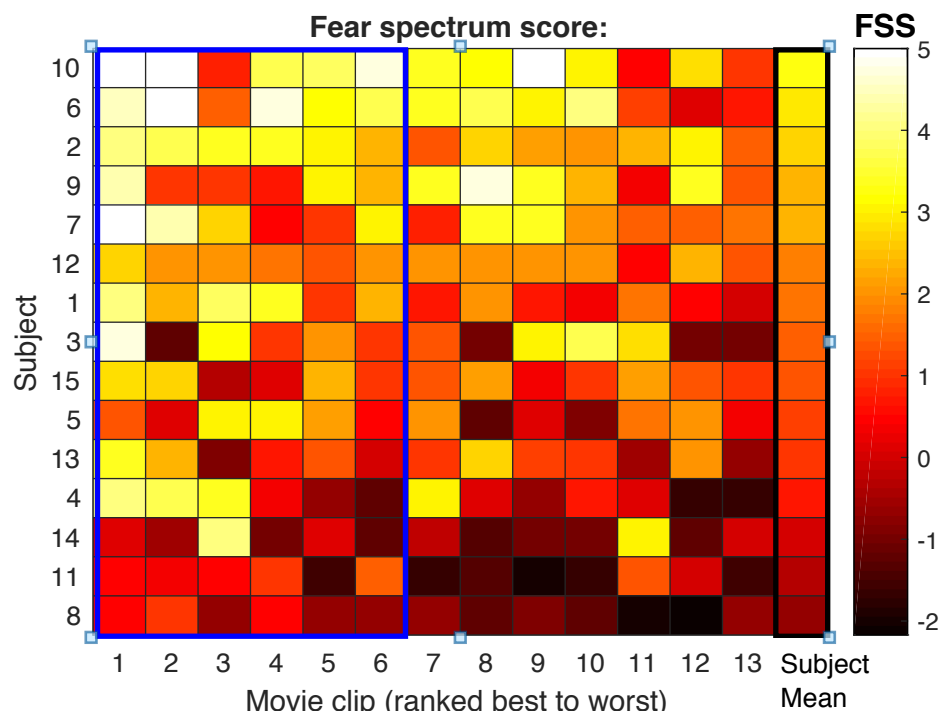

**Figure S1.** Heat map showing fear spectrum scores (FSS: feeling fearful, nervous, and tense vs. other states) across subjects across film clips (ranked from highest to lowest mean fear spectrum score). Blue rectangle (left): six highest ranked film clips were selected for the final study (~30 min of material). Black rectangle (right): Average FSS per subject showing broad spectrum of subjective fear experience across subjects. Clip #1: “Vicious”, 2: “Cop Cam”, 3: “100% Organic”, 4: “Mr. Creak”, 5: “Night Night Nancy”, 6: “Blair Witch Project”, 7: “The Binding Box”, 8: “Rake”, 9: “Occupied”, 10: “Hostel”, 11: “Scream 1”, 12: “Copycat”.

\*Author for correspondence (j.h.b.degroot@uu.nl).

†Present address: Department of Psychology, Utrecht University, Heidelberglaan 1, Utrecht, 3584 CS, the Netherlands

**Supplementary Table S1**

*Descriptive statistics and non-parametric univariate tests comparing responses in the fear condition (to neutral)*

|                                                          | Fear condition<br><i>Mdn</i><br>( <i>IQR</i> ) | Neutral condition<br><i>Mdn</i><br>( <i>IQR</i> ) | Test                              |
|----------------------------------------------------------|------------------------------------------------|---------------------------------------------------|-----------------------------------|
| <b>Physiology</b>                                        |                                                |                                                   |                                   |
| Tonic skin conductance level ( $\mu$ S)                  | 1.72 $\mu$ S<br>(0.77 - 2.63 $\mu$ S)          | -0.15 $\mu$ S<br>(-0.94 - 0.48 $\mu$ S)           | $Z = 5.04, p < 0.001, r = 0.84$   |
| Phasic skin conductance responses (SCR/min)              | 5.45<br>(3.71 - 8.14)                          | 2.20<br>(1.17 - 4.48)                             | $Z = 4.85, p < 0.001, r = 0.81$   |
| Armpit sweat (mg)                                        | 175 mg<br>(85 - 570 mg)                        | 95 mg<br>(40 - 197.5 mg)                          | $Z = 4.12, p < 0.001, r = 0.68$   |
| Respiratory rate (breaths/min)                           | 17.20<br>(15.87 - 18.53)                       | 16.45<br>(15.34 - 18.05)                          | $Z = 3.82, p < 0.001, r = 0.64$   |
| Heart rate (beats/min)                                   | 74.15<br>(69.74 - 83.72)                       | 71.83<br>(64.86 - 78.71)                          | $Z = 2.84, p = 0.004, r = 0.47$   |
| <b>Self-report ratings: Quadrants</b>                    |                                                |                                                   |                                   |
| Low arousal, positive affect (LA+)                       | 0.00<br>(0.00 - 0.00)                          | 3.00<br>(2.60 - 3.90)                             | $Z = -5.24, p < 0.001, r = 0.87$  |
| High arousal, negative affect (HA-)                      | 2.44<br>(1.88 - 3.09)                          | 0.00<br>(0.00 - 0.25)                             | $Z = 5.23, p < 0.001, r = 0.87$   |
| High arousal, positive affect (HA+)                      | 1.50<br>(0.75 - 2.33)                          | 0.00<br>(0.00 - 1.00)                             | $Z = 4.03, p < 0.001, r = 0.67$   |
| Low arousal, negative affect (LA-)                       | 0.00<br>(0.00 - 0.25)                          | 0.13<br>(0.00 - 0.75)                             | $Z = -2.31, p = 0.021, r = 0.38$  |
| <b>Self-report: High arousal, negative valence items</b> |                                                |                                                   |                                   |
|                                                          | Fear condition                                 |                                                   | Test                              |
| Fear (target state)                                      | 3.00 (3.00 - 4.00)                             |                                                   |                                   |
| Anger                                                    | 0.00 (0.00 - 0.00)                             |                                                   | $Z = 5.16, p < 0.001$ (vs. fear)  |
| Upset                                                    | 0.00 (0.00 - 2.00)                             |                                                   | $Z = 5.12, p < 0.001$ (vs. fear)  |
| Disgust                                                  | 1.00 (0.00 - 3.00)                             |                                                   | $Z = 4.25, p < 0.001$ (vs. fear)  |
| Stressed                                                 | 3.00 (1.25 - 4.00)                             |                                                   | $Z = 2.13, p = 0.033$ (vs. fear)  |
| Nervous                                                  | 3.00 (3.00 - 4.00)                             |                                                   | $Z = -0.85, p = 0.397$ (vs. fear) |
| Tense                                                    | 4.00 (3.00 - 4.00)                             |                                                   | $Z = -1.31, p = 0.191$ (vs. fear) |
| Alert                                                    | 4.00 (4.00 - 5.00)                             |                                                   | $Z = -3.60, p < 0.001$ (vs. fear) |

**Univariate approach: Additional indicators of discrete fear**

Wilcoxon signed ranks tests were performed to rule out that fear-induced donors experienced more arousal irrespective of valence (positive vs. negative affect). Indeed, whereas the fear condition yielded the highest ratings on the *HA- item cluster* (e.g., fearful, tense, stressed) versus the other quadrants (HA+, LA-, LA+;  $Z_s > 3.65, p_s < 0.001$ ), the neutral condition evoked the highest scores on the opposing *LA+ item cluster* (e.g., calm, serene), (vs. HA-, HA+, LA-:  $Z_s > 5.49, p_s < 0.001$ ). Overall, the fear condition induced more fear-related feelings (alert, fearful, nervous, and tense) than other non-targeted HA- discrete feeling states (i.e., anger, disgust) (see Table S1, Figure S2).

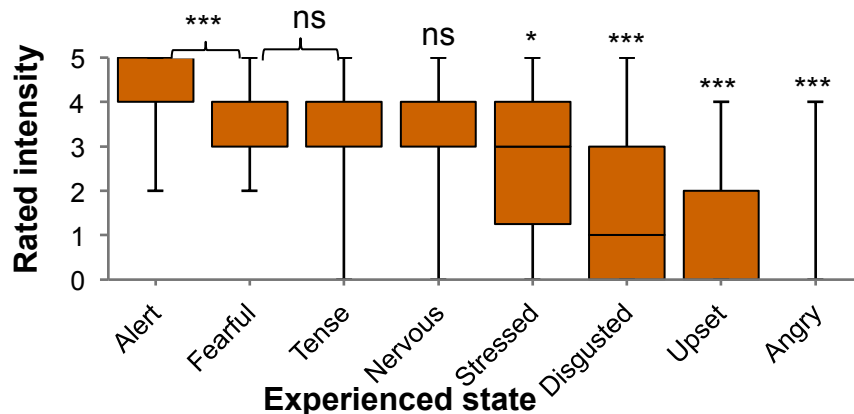

**Figure S2.** Graph showing fear-induced donors' intensity of experienced feelings on the high arousal, negative affect (HA-) quadrant. Significance values indicate comparisons of that state with the target state "fearful" (ns = not significant; \* $p < 0.05$ ; \*\* $p < 0.01$ ; \*\*\* $p < 0.001$ ).

**Multivariate approach: Relative contribution independent variables to fear-neutral classification**

We explored the relative contribution of each subjective and physiological variable in predicting fear class membership as indicated by *standardized* regression coefficients (for an absolute ranking, cf. Figure 3B in the main text). This approach revealed that fear responses were best classified by *low* values on questions such as calmness (LA+ cluster: -0.27) and *high* values on questions such as fear/tension/stress (HA- cluster: 0.26), followed by high galvanic skin responses (SCL: 0.18, SCR: 0.14), higher feelings on the HA+ cluster (0.13), more armpit sweat (0.11), lower feelings on the LA- cluster (-0.08), higher respiratory rate (0.05), and higher heart rate (0.04). The relatively low RR and HR coefficients may be due to more noise (e.g., a finger pulse electrode measured HR, and movements produced artefacts). The relatively high values on self-report measures could be explained by the emotion manipulation (fear, calm-neutral) being obvious and open to reflection.
